# Supplementary material for: Genome-wide CRISPR/Cas9 library screening identified PHGDH as a critical driver for Sorafenib resistance in HCC
Source: PubMed Central journal article supplement (PMC6794322; doi:10.1038/s41467-019-12606-7), 2019-10-15
Supplement: 41467_2019_12606_MOESM2_ESM.pdf [file 41467_2019_12606_MOESM2_ESM.pdf]

目前的 PDF 瀏覽器不能顯示檔案的全部內容，請更新至最新的版本以便檢視文件。
